# Supplementary material for: Hand grab or noose pole? Evaluating the least stressful practice for capture of endangered Turks and Caicos Rock Iguanas Cyclura carinata
Source: PeerJ. 2024 Apr 18;12:e17171. doi: 10.7717/peerj.17171 (PMC11032654; doi:10.7717/peerj.17171)
Supplement: Supplemental Information 2 [file peerj-12-17171-s002.xlsx]

## Sheet: Sheet1
count_id	animal_id	capt_type	capture_method	sex	date	island	svl	mass	hr_min	lact_1	lact_2	Na	K	Cl	iCa	T_CO2	Glu	Hct	Hb	AnionGap	HctPCVMan	TotalSolids
1	6PC	newcap	snare	M	2022-02-24	Pine Cay	390	2845	72	13.5	9.6	165	NA	121	1.61	22	177	33	11.2	NA	37.5	10.9
2	7PC	newcap	snare	M	2022-02-24	Pine Cay	231	625	126	17.9	16.8	161	NA	111	1.28	25	206	29	9.9	NA	40.5	8.4
3	J338LW	recap	snare	F	2022-02-25	Little Water Cay	202	335	66	NA	13.1	150	4.6	119	1.32	11	161	21	7.1	25	25	6
4	324LW	recap	snare	F	2022-02-25	Little Water Cay	228	475	72	9.2	14.6	155	5.1	126	1.41	18	123	20	6.8	18	31	8.2
5	J324LW	recap	snare	M	2022-02-25	Little Water Cay	219	425	102	10.9	16.7	160	4.7	130	1.55	13	137	27	9.2	22	27.5	7.7
6	338LW	recap	hand	M	2022-02-25	Little Water Cay	317	1240	78	4.4	10.9	155	5.1	126	1.46	26	128	20	6.8	15	22	7.4
7	353LW	recap	hand	F	2022-02-25	Little Water Cay	235	580	72	6.6	13.5	153	3.7	127	1.73	18	160	20	6.8	13	24.5	8
8	418LW	recap	hand	F	2022-02-25	Little Water Cay	255	630	66	5.4	13.9	157	4.7	134	1.46	13	137	19	6.5	15	23	8.3
9	343LW	recap	hand	M	2022-02-25	Little Water Cay	310	1350	60	10.6	15.8	161	3.8	127	1.74	14	143	25	8.5	24	30	9.1
10	251LW	recap	hand	F	2022-02-25	Little Water Cay	255	710	84	5.6	14.1	151	3	118	1.53	23	135	20	6.8	15	25	9.3
11	647LW	newcap	hand	F	2022-02-25	Little Water Cay	211	475	78	8.2	21.6	153	4.3	123	1.5	18	137	26	8.8	18	30	7.3
12	416LW	recap	hand	M	2022-02-25	Little Water Cay	314	1300	66	8.5	NA	158	4.4	128	1.45	14	131	24	8.2	20	25	7
13	253LW	recap	hand	M	2022-02-25	Little Water Cay	337	1340	66	2	15.6	152	3.9	121	1.57	22	122	24	8.2	15	22	7
14	648LW	newcap	snare	M	2022-02-27	Little Water Cay	277	1070	78	9.9	16.6	167	3.2	133	1.57	14	147	30	10.2	25	35.5	10.7
15	651LW	newcap	hand	F	2022-02-27	Little Water Cay	222	490	78	3.8	14	153	3.7	125	1.33	18	152	28	9.5	15	32	9.5
16	573LW	recap	hand	M	2022-03-01	Little Water Cay	362	1840	78	6.4	13.5	160	2.4	127	1.61	13	158	27	9.2	23	34	8.6
17	652W	newcap	hand	F	2022-03-01	Little Water Cay	224	531	90	4.3	17.7	153	2.4	117	1.38	21	142	26	8.8	19	33	8
18	J341LW	recap	snare	F	2022-03-01	Little Water Cay	106	51	102	9.7	18.6	150	2.4	130	1.1	9	173	19	6.5	14	26	6
19	653LW	newcap	snare	F	2022-03-01	Little Water Cay	229	620	84	14.6	22.3	157	2.7	122	1.33	13	164	23	7.8	26	NA	9.9
20	654LW	newcap	snare	F	2022-03-01	Little Water Cay	258	855	96	12.7	16.9	160	2	132	1.48	13	144	29	9.9	18	NA	10.7
21	655LW	newcap	snare	F	2022-03-01	Little Water Cay	229	565	96	11.4	15.8	153	4.6	131	1.13	10	103	24	8.2	17	33	8.7
22	656LW	newcap	hand	F	2022-03-01	Little Water Cay	264	430	66	2.3	14.7	164	2.2	128	1.39	21	169	21	7.1	18	25	6.7
23	657LW	newcap	hand	M	2022-03-01	Little Water Cay	337	1680	84	6.6	15.8	153	3.9	129	1.39	11	150	24	8.2	18	29	7.5
24	J23LIZ	newcap	snare	M	2022-03-02	Lizard Cay	99	35.5	138	NA	22.5	NA	NA	NA	NA	NA	NA	NA	NA	NA	NA	NA
25	J5LIZ	recap	snare	F	2022-03-02	Lizard Cay	189	280	96	12.6	15.1	160	7.3	133	1.54	16	132	22	7.5	19	28.5	NA
26	11LIZ	recap	snare	F	2022-03-02	Lizard Cay	240	510	84	5.2	15	157	3.8	128	1.35	13	134	18	6.1	21	22	NA
27	15BIR	recap	hand	M	2022-03-02	Bird Cay	281	880	96	8.8	17	159	NA	117	1.49	25	152	22	7.5	NA	29	NA
28	14BIR	recap	snare	M	2022-03-02	Bird Cay	267	815	108	11	17.4	163	3.4	124	1.4	20	163	23	7.8	23	27	NA
29	13BIR	recap	snare	M	2022-03-02	Bird Cay	292	1025	96	14.3	15.4	162	NA	125	1.43	15	157	25	8.5	NA	30	NA
30	12BIR	recap	snare	M	2022-03-02	Bird Cay	286	1050	126	14.2	22.9	160	NA	119	1.24	18	128	24	8.2	NA	30.5	NA
31	516BA	newcap	hand	M	2022-08-08	Big Ambergris Cay	383	2470	96	3.1	13.8	164	4.5	133	1.28	18	129	23	7.8	19	26	8.4
32	517BA	newcap	hand	M	2022-08-08	Big Ambergris Cay	351	2270	90	9.3	19.2	171	2.3	129	1.28	10	131	31	10.5	35	33.5	9.2
33	518BA	newcap	hand	M	2022-08-08	Big Ambergris Cay	361	2450	66	4.3	13.5	162	4.6	133	1.18	12	120	26	8.8	23	29.5	8.3
34	361BA	recap	hand	F	2022-08-09	Big Ambergris Cay	313	1510	120	5	13.4	163	NA	113	1.33	31	161	27	9.2	NA	29	9.7
35	521BA	newcap	hand	M	2022-08-09	Big Ambergris Cay	376	2672	120	9.6	16.7	166	2.7	116	1.48	30	150	34	11.6	23	38	10.9
36	J237BA	recap	hand	F	2022-08-10	Big Ambergris Cay	245	710	126	NA	20.7	168	4.3	126	1.33	14	137	30	10.2	32	37	10.8
37	522BA	newcap	snare	M	2022-08-11	Big Ambergris Cay	267	720	102	11	10.7	144	4.2	119	0.77	18	131	18	6.1	12	26	6.5
38	523BA	newcap	snare	F	2022-08-11	Big Ambergris Cay	265	640	96	9.5	13.2	158	3.8	125	1.3	15	151	21	7.1	23	25	7.1
39	524BA	newcap	snare	F	2022-08-11	Big Ambergris Cay	294	980	96	4	15.9	159	3.8	118	1.28	17	135	28	9.5	29	34	8.3
40	J351BA	newcap	snare	F	2022-08-11	Big Ambergris Cay	155	135	120	10.3	15.6	162	2.4	119	1.23	28	193	26	8.8	18	33	8
41	371BA	recap	snare	M	2022-08-12	Big Ambergris Cay	296	890	108	6.2	11.3	161	3.4	128	1.16	26	142	21	7.1	12	27	6.6
42	525BA	newcap	snare	F	2022-08-12	Big Ambergris Cay	260	725	96	4.3	13	158	2.6	126	1.49	23	206	29	9.9	13	45	7
43	J352BA	newcap	snare	M	2022-08-12	Big Ambergris Cay	172	169	120	7.3	14.3	166	NA	126	1.27	11	213	40	13.6	NA	34	8.1
44	J353BA	newcap	snare	M	2022-08-12	Big Ambergris Cay	205	320	120	8.3	16.8	165	4.1	126	1.36	21	185	24	8.2	23	29	8.3
45	526BA	newcap	snare	F	2022-08-12	Big Ambergris Cay	261	650	132	5.6	15.8	157	5	128	1.31	20	157	23	7.8	16	30	7.3
